# Supplementary material for: Quantitative and Molecular Genetic Analyses of Mutations Increasing Drosophila Life Span
Source: PubMed Central journal article supplement (PMC2912381; doi:10.1371/journal.pgen.1001037), 2010-07-29

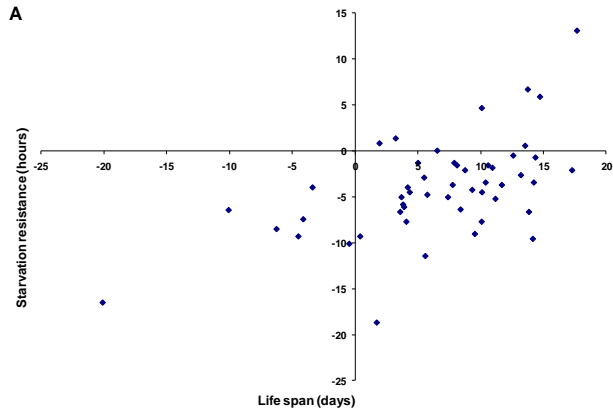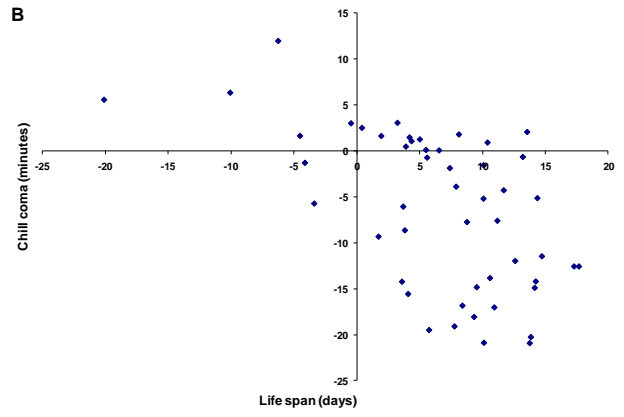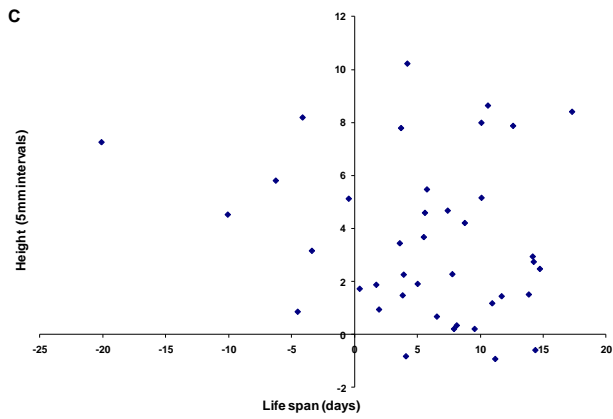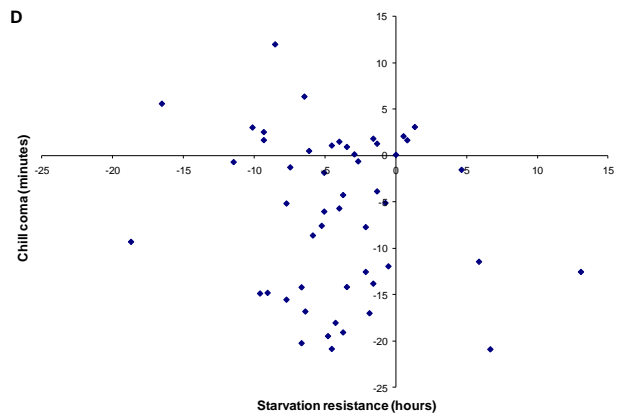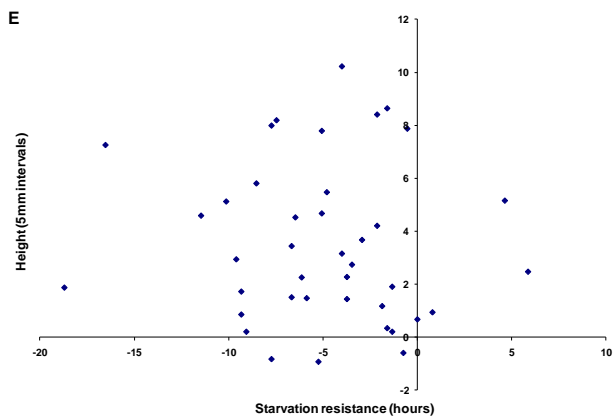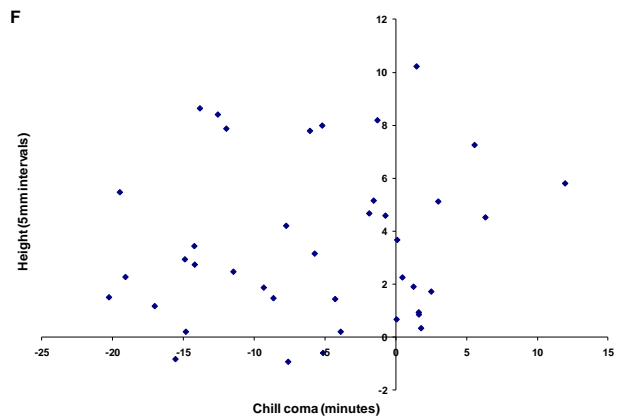

Supplement: pgen.1001037.s003.pdf [file pgen.1001037.s003.pdf]
